# Supplementary material for: A Point-of-Care Testing Device Utilizing Graphene-Enhanced Fiber Optic SPR Sensor for Real-Time Detection of Infectious Pathogens
Source: MDPI journal article supplement (doi:10.3390/bios13121029), 2023-12-14
Supplement: s1 [file s1]

# A point-of-care testing device utilizing graphene-enhanced fiber optic SPR sensor for real-time detection of infectious pathogens

Shiyu Jiang <sup>1,2</sup>, Siyu Qian <sup>1,\*</sup>, Shunning Zhu <sup>1</sup>, Jinxin Lu <sup>1</sup>, Yunxin Hu <sup>1,2</sup>, Cheng Zhang <sup>3</sup>, Yikai Geng <sup>1</sup>, Xuefeng Chen <sup>1</sup>, Ying Guo <sup>1</sup>, Zhaoliang Chen <sup>3</sup>, Jie Pu <sup>3</sup>, Zhendong Guo <sup>3</sup> and Shengchun Liu <sup>1,\*</sup>

<sup>1</sup> Heilongjiang Provincial Key Laboratory of Metamaterials Physics and Device, Heilongjiang University, Harbin, 150080, China

<sup>2</sup> School of Electronic Engineering, Heilongjiang University, Harbin, 150080, China

<sup>3</sup> Changchun Veterinary Research Institute, Chinese Academy of Agricultural Sciences, Changchun, 130122, China

\* Correspondence: liushengchun@hlju.edu.cn (S. C. Liu), qiansiyu@hlju.edu.cn (S. Y. Qian).

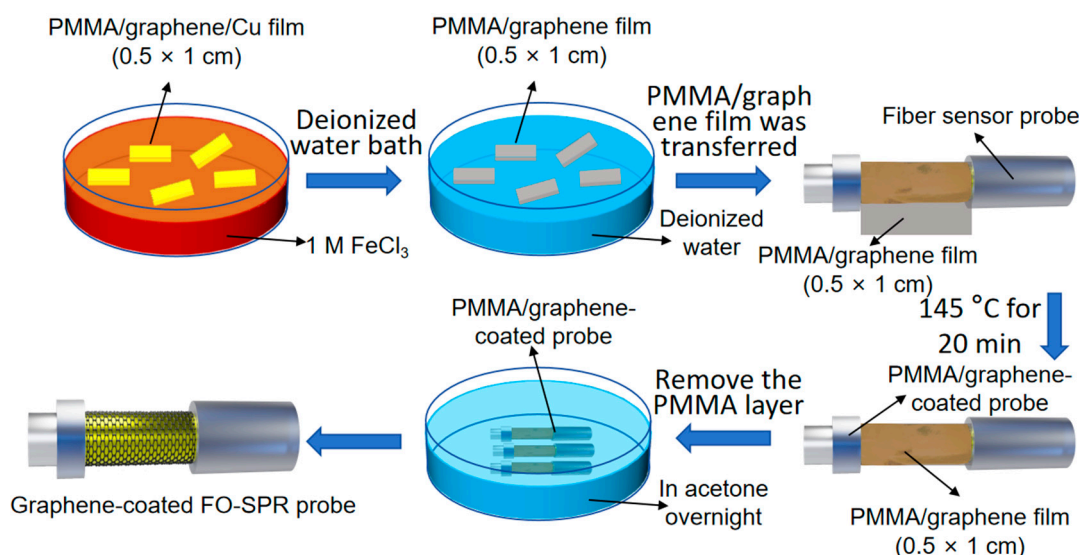

**Figure S1.** Scheme of the graphene-coated FO-SPR sensing probe.

## 11-MUA-modified FO-SPR sensing probes.

The FO-SPR sensing probe with bare gold was immersed in 1 mM 11-MUA in ethanol at room temperature overnight and alternately rinsed with ethanol and deionized water. Then, to activate the carboxyl group, the FO-SPR probe was placed in an aqueous 0.5 M NHS/EDC solution for 20 min and rinsed with deionized water. The sensing probe was immersed in 250 µg/mL SARS-CoV-2 spike S1 antibody in PBS for 45 min. Finally, the probe was put in 1 mg/mL BSA for 1 h.

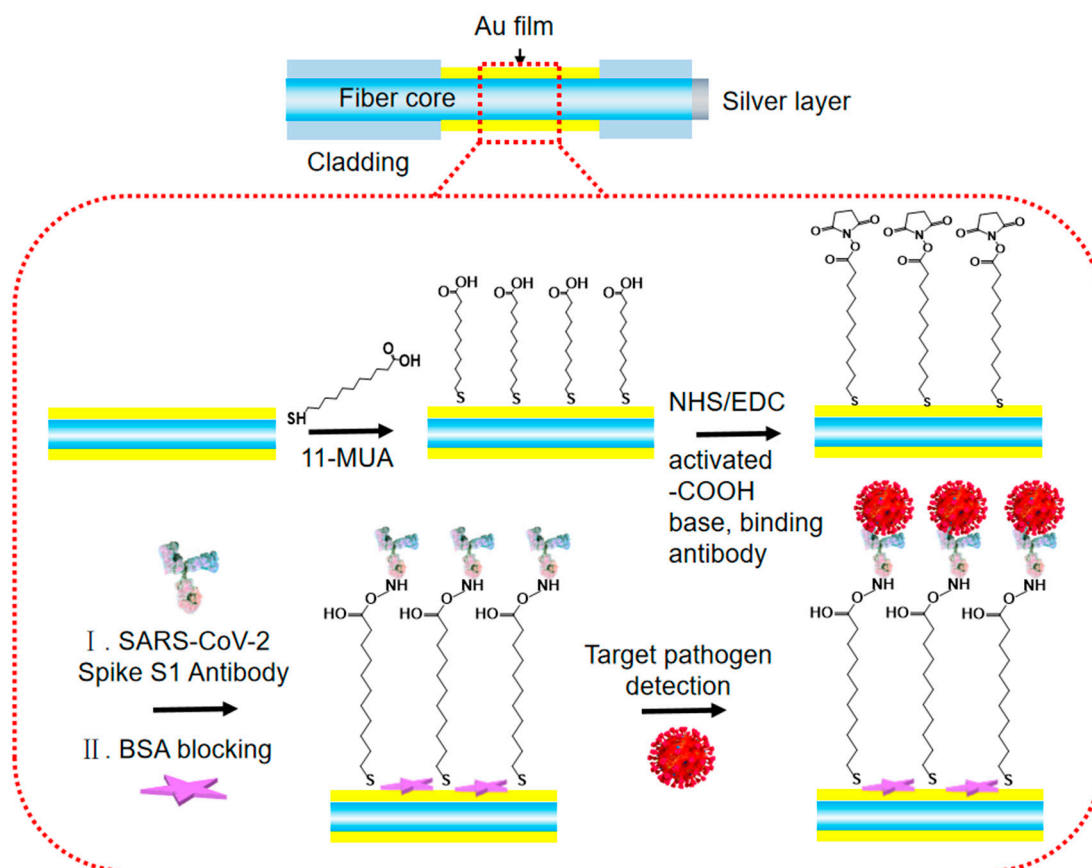

**Figure S2.** Scheme of the bio-functionalized FO-SPR sensing probe.

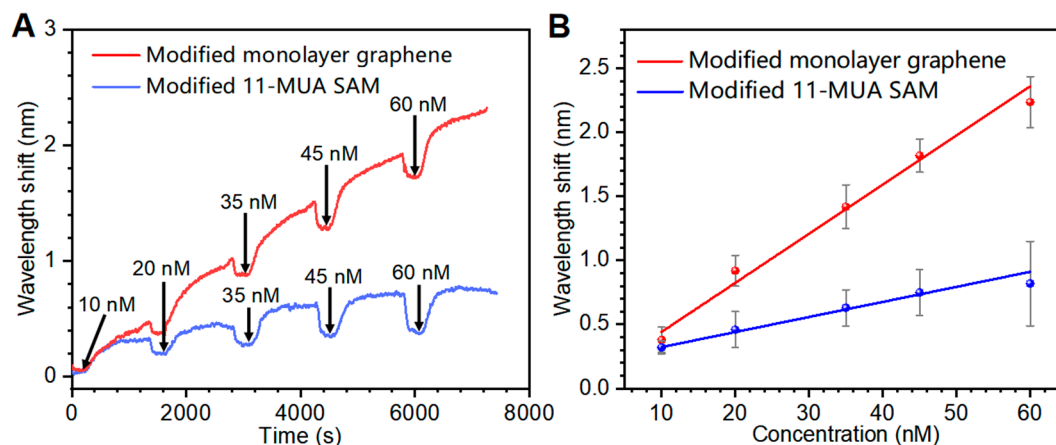

**Figure S3.** Testing SARS-CoV-2 spike S1 protein via portable FO-SPR device. (A) The graphene-coated FO-SPR sensing probe wavelength shift curve (red) and the conventional 11-MUA-modified FO-SPR sensing probe wavelength shift curve (blue). (B) The graphene-coated FO-SPR sensing probe (red) and the conventional 11-MUA-modified FO-SPR sensing probe (blue) were linearly fitted for different protein concentrations and wavelength shifts. Error bars were determined by the standard deviation of three tests.

**Table S1.** RSD for repeatability analysis.

| SARS-CoV-2 spike S1 protein concentration | Relative standard deviation (RSD) | Repeatability (100%-RSD ) |
|-------------------------------------------|-----------------------------------|---------------------------|
| 10 nM                                     | 22.8                              | 77.2                      |
| 20 nM                                     | 15.5                              | 84.5                      |
| 35 nM                                     | 12.2                              | 87.8                      |
| 45 nM                                     | 8.6                               | 91.4                      |
| 60 nM                                     | 6.8                               | 93.2                      |

**Table S2.** Comparison of SPR methods for biosensing analysis.

| Method      | Type of receptor                     | Target analyte                                  | Linear range                                                                                        | Limit of detection                                 | Ref       |
|-------------|--------------------------------------|-------------------------------------------------|-----------------------------------------------------------------------------------------------------|----------------------------------------------------|-----------|
| SPR         | Escherichia coli                     | Phage T4                                        | 0 PFU/mL - $2 \times 10^8$ PFU/mL                                                                   | $1 \times 10^7$ PFU/mL                             | [1]       |
| SPR         | polyclonal antibody                  | Salmonella enterica                             | -                                                                                                   | $10^5$ CFU/mL                                      | [2]       |
| LSPR        | Casein                               | Trypsin                                         | 0.1 $\mu$ g/mL - 100 $\mu$ g/mL                                                                     | 4.3 nM                                             | [3]       |
| SPR         | Hb antibody                          | Hb                                              | 5 $\mu$ g/mL - 250 $\mu$ g/mL                                                                       | 0.078 $\mu$ M                                      | [4]       |
| SPR         | Antibody                             | HIV-1 p24 capsid protein                        | -                                                                                                   | $4.1 \pm 0.5$ nM                                   | [5]       |
| FO-SPR      | SPA                                  | IgG                                             | 30 $\mu$ g/mL - 100 $\mu$ g/mL                                                                      | 0.5 $\mu$ g/mL                                     | [6]       |
| FO-SPR      | DNA-aptamer                          | SARS-CoV-2 spike protein                        | 25 nM - 1 $\mu$ M                                                                                   | 37 nM                                              | [7]       |
| FO-SPR      | Anti-ADM monoclonal antibody         | ADM                                             | -                                                                                                   | 0.25 $\mu$ g/mL                                    | [8]       |
| FO-SPR POCT | SARS-CoV-2 spike S1 protein antibody | SARS-CoV-2 spike S1 protein<br>SARS-CoV-2 virus | 10 nM - 60 nM<br>$5 \times 10^3$ TCID <sub>50</sub> /mL -<br>$6 \times 10^4$ TCID <sub>50</sub> /mL | 2.5 nM<br>$2.2 \times 10^3$ TCID <sub>50</sub> /mL | This work |

LSPR: Localized surface plasmon resonance; HIV: Human immunodeficiency virus; SPA: Staphylococcal protein A; Hb: hemoglobin; IgG: Human immunoglobulin G; ADM: Adalimumab.

## References

- [1] Xiao, C.Q.; Jiang, F.L.; Zhou, B.; Li, R.; Liu, Y. Immobilization of Escherichia coli for detection of phage T4 using surface plasmon resonance. *Science China Chemistry* 2012, 55, 1931-1939. <https://doi.org/10.1007/s11426-012-4553-6>.
- [2] Makhneva, E.; Farka, Z.; Skládal, P.; Zajíčková, L. Cyclopropylamine plasma polymer surfaces for label-free SPR and QCM immunosensing of Salmonella. *Sensors and Actuators B: Chemical* 2018, 276, 447-455. <https://doi.org/10.1016/j.snb.2018.08.055>.
- [3] Svärd, A.; Neilands, J.; Palm, E.; Svensäter, G.; Bengtsson, T.; Aili, D. Protein-Functionalized Gold Nanoparticles as Refractometric Nanoplasmonic Sensors for the Detection of Proteolytic Activity of Porphyromonas gingivalis. *ACS Applied Nano Materials* 2020, 3, 10, 9822-9830. <https://doi.org/10.1021/acsanm.0c01899>.
- [4] Inci, F.; Saylan, Y.; Kojouri, A.M.; Ogut, M.G.; Denizli, A.; Demirci, U. A disposable microfluidic-integrated hand-held plasmonic platform for protein detection. *Applied Materials Today* 2020, 18, 100478. <https://doi.org/10.1016/j.apmt.2019.100478>.
- [5] Sarcina, L.; Mangiatordi, G.F.; Torricelli, F.; Bollella, P.; Gounani, Z.; Österbacka, R.; Macchia, E.; Torsi, L. Surface Plasmon Resonance Assay for Label-Free and Selective Detection of HIV-1 p24 Protein. *Biosensors* 2021, 11, 6, 180. <https://doi.org/10.3390/bios11060180>.
- [6] Wang, Q.; Jing, J.Y.; Wang, B.T. Highly Sensitive SPR Biosensor Based on Graphene Oxide and Staphylococcal Protein A Co-Modified TFBG for Human IgG Detection. *IEEE Transactions on Instrumentation and Measurement* 2019, 68, 9, 3350-3357. <https://doi.org/10.1109/TIM.2018.2875961>.
- [7] Cennamo, N.; Pasquardini, L.; Arcadio, F.; Lunelli, L.; Vanzetti, L.; Carafa, V.; Altucci, L.; Zeni, L. SARS-CoV-2 spike protein detection through a plasmonic D-shaped plastic optical fiber aptasensor. *Talanta* 2021, 233, 122532. <https://doi.org/10.1016/j.talanta.2021.122532>.
- [8] Qu, J.H.; Ordutowski, H.; Tricht, C.V.; Verbruggen, R.; Gallardo, A.B.; Bulcaen, M.; Ciwinka, M.; Cisneros, C.C.; Devriese, C.; Guluzade, S.; Janssens, X.; Kornblum, S.; Lu, Y.H.; Marolt, N.; Nanjappan, C.; Rutten, E.; Vanhauwaert, E.; Geukens, N. Thomas, D.; Dosso, F.D.; Safdar, S.; Spasic, D.; Lammertyn, J. Point-of-care therapeutic drug monitoring of adalimumab by integrating a FO-SPR biosensor in a self-powered microfluidic cartridge. *Biosensors and Bioelectronics* 2022, 206, 114125. <https://doi.org/10.1016/j.bios.2022.114125>.
